# Supplementary material for: Surgical Screening Protocol for Craniocervical Instability Secondary to Ehlers-Danlos Syndrome and other Connective Tissue Disorders: Analysis of a 347 Patient Case Series
Source: Research Square preprint supplement (doi:10.21203/rs.3.rs-7675903/v1), 2025-12-03
Supplement: Supplementary file 1 [file 0da4602a9e648cfdcadfe375.docx]

**Morphometric Measurements on MRI**

The following morphometric measurements were made on MRI.

1. The Basion-dens interval (BDI) was measured by drawing the shortest line between the tip of the basion and top of dens.15
2. The Basion-axis interval or (BAI) was measured by drawing a line aimed posteriorly, originating from the basion and ending at a reference line, drawn from the most posterior inferior point of C2, extending cranially and tangentially along the most posterior aspect of C2, including the ligament.15 The Basion-axis Interval should not be confused with the Basion-atlas Interval, which shares the same acronym.
3. The Grabb-Oakes line (also known as pB-C2) was measured by drawing a line along the shortest distance from the most posterior point of the odontoid profile including the ligament to a reference line drawn between the basion and the most inferior and posterior aspect of C2.16
4. The Clivo-axial angle (CXA) was measured as the intersection of two lines.16 The first line is the same as the reference line drawn in measurement of the BAI. Typically, the second line is taken as a tangent to the superior aspect of the lower half of the clivus that continues until it intersects the posterior aspect of C2 on a sagittal section, with the goal of approximate the long axis surface of the clivus. Here, we decided to use the inferior third of the superior surface of the clivus to increase the reproducibility of the measurements in this population of individuals with CTDs who tend to, in our experience, have abnormal morphology of the clivus.

**Morphometric Measurements on Digital Fluoroscopic Images**

We measured the morphometric parameters listed above (BDI, BAI, pB-C2, and CXA) on digital fluoroscopic images acquired both before traction and at peak traction. Unlike on MRI imaging, where we included the ligamentous structures in the morphometric assessments (“soft measurements”), we used boney landmarks on the digital fluoroscopic images (“hard measurements”). In cases of poorly visualized anatomic landmarks, *e.g.* osteopenia, we confirmed their locations by rotating the patients head under continuous fluoroscopy, adjusting the radiation intensity, applying different available filters, and modulating the image in postprocessing. We calculated translational values for each morphometric parameter by subtracting the peak-traction measurement from its pre-traction counterpart.
