# Supplementary material for: Surgical Screening Protocol for Craniocervical Instability Secondary to Ehlers-Danlos Syndrome and other Connective Tissue Disorders: Analysis of a 347 Patient Case Series
Source: Research Square preprint supplement (doi:10.21203/rs.3.rs-7675903/v1), 2025-12-03
Supplement: Supplementary file 2 [file 3ff60d3769b47325702c5d3f.docx]

**Subgroup 1 – Reasons for Failure**

Sub-cohort 1 was further stratified according to the specific component(s) of the advanced evaluation in which individuals did not meet criteria:

- **Both clinical and morphometric ICT criteria:** 41% (n = 26)
- **Clinical ICT criteria only:** 22% (n = 14)
- **Morphometric ICT criteria only:** 30% (n = 19)
- **Psychiatric evaluation:** 6% (n = 4)
