# Supplementary material for: Surgical Screening Protocol for Craniocervical Instability Secondary to Ehlers-Danlos Syndrome and other Connective Tissue Disorders: Analysis of a 347 Patient Case Series
Source: Research Square preprint supplement (doi:10.21203/rs.3.rs-7675903/v1), 2025-12-03
Supplement: Supplementary file 3 [file 4b70b3475af33e97e614f81f.xlsx]

## Sheet: << Depersonalized
Pt #	DEMOGRAPHICS >>	Sex	Age	Subgroup	Ehlers-Danlos Syndrome	Chiari I Malformation	Tethered Cord Syndrome	Mast Cell Activation Disorrder	Post-Treatment Lyme Disease Syndrome	Dysautonomia	Postural Orthostatic Tachycardia Syndrome	Median Arcuate Ligament Syndrome	Myalgic Encephalomyelitis/Chronic Fatigue Syndrome	Small Fiber Polyneuropathy	Hypothyroidism	Gastroesophageal Reflux Disease	Gastroparesis	Styloid hypertrohpy/Eagle's Syndrome	PRE-ICT INTAKE >>	Do you have a pressure headache?	Is your headache localized in the back of the head?	Is the headache aggravated by coughing and straining?	Does the pain radiate to neck and/or shoulders?	Do you have pain or pressure behind the eyes?	Do you have problems swallowing?	Do you have problems swallowing liquids?	Do you have problems swallowing solids?	Do you feel a lump in the back of your throat?	Do you feel pain in the back of your throat?	Do you have palpitations?	Do you pass out?	Do you “almost pass out”?	Do you have sleep apnea?	Do you use a CPAP or BiPAP machine at night?	Do you snore?	Do you gasp for air during your sleep?	Are you short of breath?	Do you have severe nausea?	Are you getting hoarse?	Are you sensitive to light?	Do you often change prescriptions for your glasses?	Do you see double?	Do you see blurred?	Do you see floaters?	Do you have nystagmus?	Do staring at patterns on the floor make you dizzy?	Do you feel pressure deep inside your ears?	Does changing position make you dizzy?	Do you feel unsteady while standing still?
1	1 = Presenting	F	35.8192	2	1	1	0	0	0	0	0	0	0	0	0	0	0	1	1 = Presenting	1	1	1	1	1	0	0	0	0	1	1	0	1	1	0	1	1	0	1	1	1	1	0	1	1	1	1	0	1	1
2	0 = Negative/null	F	17.3397	1	1	0	1	1	0	1	1	0	1	0	1	0	1	0	0 = Negative/null	1	0	1	1	1	0	0	0	0	0	1	0	1	0	0	0	0	0	1	0	1	0	0	1	0	0	0	0	1	1
3		F	44.5699	1	1	0	0	1	0	1	1	0	1	1	0	1	0	1		1	1	1	1	1	1	0	1	1	1	1	0	1	0	0	0	0	1	1	0	1	0	0	0	1	0	1	1	1	1
4		F	41.7589	4	1	0	1	1	0	1	0	0	0	0	1	0	0	0		1	1	1	1	1	0	0	0	0	0	1	0	1	0	0	0	0	1	0	0	1	0	1	1	1	1	0	1	1	1
5		F	36.5178	3	1	1	1	1	0	1	1	0	1	0	0	0	0	0		1	1	1	1	1	0	0	1	1	1	1	0	1	0	0	0	0	1	1	0	1	0	0	0	0	0	1	0	0	1
6		F	59.3836	1	1	0	0	0	0	0	0	0	1	0	0	0	0	0		1	1	1	1	0	0	0	0	0	0	0	0	0	0	0	1	1	1	1	1	0	0	1	0	0	0	0	0	0	0
7		F	37.3863	1	1	0	0	1	0	0	1	0	0	1	0	0	0	0		1	1	1	1	0	1	0	1	1	0	1	0	1	1	1	1	1	1	1	0	1	0	0	0	1	1	1	1	1	1
8		M	37.126	2	1	0	1	1	0	1	1	0	1	1	0	0	0	1		1	0	1	0	1	1	0	1	1	1	1	0	0	0	0	0	0	0	0	1	1	0	0	1	1	0	0	1	1	0
9		F	45.6986	1	1	1	0	0	0	0	1	0	0	0	0	0	1	0		1	1	1	1	1	1	0	1	0	0	1	1	1	0	0	0	0	0	1	1	1	0	1	1	1	0	1	1	1	0
10		F	45.4877	3	1	0	1	1	0	1	0	0	1	1	0	1	1	1		1	0	1	1	1	1	1	1	1	1	1	0	0	1	1	0	0	1	0	0	1	1	0	1	1	0	0	1	1	0
11		F	28.9836	3	1	0	0	1	0	0	1	1	0	0	0	0	1	1		1	1	1	1	1	1	0	0	0	0	1	1	1	0	0	1	0	1	1	1	1	0	1	1	1	1	1	1	1	1
12		F	67.5908	1	1	0	0	1	0	0	0	0	1	0	1	0	0	0		1	0	0	0	1	1	1	1	1	0	0	0	1	0	0	1	0	0	0	1	0	0	1	1	1	0	0	1	1	1
13		M	40.3315	1	0	1	0	0	0	0	0	0	1	0	0	0	0	1		1	0	1	1	1	0	0	0	1	0	1	0	1	0	0	1	0	0	0	0	1	0	0	1	1	0	1	0	0	1
14		F	13.2932	4	1	0	1	1	0	1	1	0	0	0	0	0	0	0		1	0	1	1	0	1	0	1	0	1	1	1	1	0	0	0	0	0	1	1	1	0	0	0	1	0	1	1	1	1
15		F	36.0493	3	0	0	1	1	0	1	1	0	1	0	1	0	0	0		1	1	0	1	1	0	0	0	0	0	1	0	1	1	0	0	1	1	0	0	1	0	0	1	1	0	1	0	1	0
16		F	35.411	3	1	0	1	1	0	1	0	0	1	0	0	0	0	1		1	1	1	1	1	0	0	0	0	0	1	0	1	1	0	0	1	1	0	0	1	0	0	1	1	1	1	1	1	1
17		M	40.1616	3	0	1	0	0	0	0	0	0	0	0	0	0	0	0		1	1	1	1	1	1	1	1	0	1	1	0	1	0	0	1	1	1	1	1	1	0	0	1	1	1	1	1	1	1
18		F	34.3014	3	1	1	1	1	0	1	1	0	1	1	1	1	0	0		1	1	1	1	1	1	0	1	1	1	1	0	1	0	0	1	0	1	1	1	1	0	1	1	1	0	1	1	1	1
19		F	36.8082	1	0	0	1	1	0	1	1	0	1	0	0	0	0	0		1	1	1	1	1	0	1	0	0	0	1	0	1	0	0	0	1	0	0	0	1	0	1	1	1	0	1	1	1	1
20		F	53.1342	4	1	1	1	0	0	0	0	0	0	0	0	0	0	0		1	0	1	1	0	0	0	0	1	0	1	0	0	0	0	0	0	0	1	0	1	0	0	0	1	0	0	0	0	0
21		F	53.1479	1	1	0	0	1	0	0	1	0	1	0	0	1	0	0		1	1	0	0	0	1	1	1	1	0	1	0	0	0	0	0	1	1	0	1	1	0	0	0	1	1	1	0	1	0
22		F	19.3726	1	1	0	0	0	0	0	0	0	0	0	0	0	0	0		1	1	1	1	1	1	1	0	1	0	1	1	1	0	0	0	1	1	1	1	1	0	0	1	1	0	1	1	1	1
23		F	42.5068	3	0	0	0	0	0	0	1	0	1	0	0	0	0	1		1	1	1	1	1	1	0	1	1	0	1	0	1	0	0	0	0	1	1	1	1	0	1	1	1	0	1	1	1	1
24		F	31.5041	1	1	0	0	1	1	0	0	0	1	0	0	0	0	0		1	1	1	1	1	1	0	1	1	1	1	0	1	0	0	0	1	1	1	1	1	0	0	1	1	1	1	1	1	1
25		F	56.2986	1	0	1	0	0	0	0	0	0	0	0	0	0	0	0		1	0	1	1	1	1	1	0	1	1	1	0	1	0	0	0	0	1	1	1	1	0	1	1	1	1	1	0	1	1
26		F	34.5068	4	1	0	0	0	1	1	0	0	1	0	0	0	0	0		1	1	1	1	1	1	1	1	1	0	1	1	1	0	0	0	0	0	1	0	1	0	0	1	1	0	1	1	1	1
27		F	28.2329	1	0	0	0	0	0	1	0	0	0	0	0	1	1	0		1	0	1	1	1	0	0	0	0	0	1	0	1	0	0	0	0	1	1	0	1	1	0	0	0	0	1	1	1	1
28		M	48.1342	1	0	0	0	1	0	0	1	0	1	0	0	0	0	0		1	1	1	1	1	1	1	1	0	0	1	0	1	1	0	1	1	1	0	1	1	0	0	1	0	0	0	1	1	1
29		F	45.8027	3	1	0	0	0	0	0	0	0	0	0	0	0	0	1		1	0	1	1	1	0	0	0	1	0	1	0	0	0	0	0	0	1	0	0	1	0	0	1	0	0	1	0	0	1
30		F	29.6466	3	1	1	0	0	0	0	0	0	0	0	0	0	0	1		1	1	1	1	1	1	1	1	1	1	1	0	1	0	0	0	0	0	1	1	1	1	0	1	1	0	1	1	1	1
31		F	24.5945	1	1	1	0	1	0	0	1	0	0	0	0	0	0	0		1	1	1	1	1	1	1	1	0	0	1	1	1	0	0	0	0	0	1	1	1	1	1	1	1	1	1	1	1	1
32		F	17.1288	3	1	0	1	1	0	0	0	0	0	0	0	0	0	1		0	1	1	1	1	1	1	1	0	0	1	1	1	0	0	0	1	1	1	0	1	0	1	1	1	1	1	1	1	1
33		F	53.2959	1	1	0	1	1	0	1	0	0	1	0	1	0	0	0		1	1	0	1	0	0	0	0	0	0	1	1	1	1	0	0	0	1	1	0	1	0	0	1	1	1	0	0	0	1
34		F	38.937	4	0	0	1	1	0	1	0	0	1	0	1	0	0	0		1	1	0	1	1	1	0	1	0	0	1	0	1	0	0	0	0	1	0	0	1	0	0	0	0	0	1	1	1	1
35		M	42.7233	1	0	1	1	0	0	0	0	0	0	0	0	0	0	0		0	0	1	1	1	1	0	1	1	0	0	0	0	0	0	1	1	1	0	1	1	0	1	1	1	1	1	1	1	1
36		M	39.1845	1	0	0	1	0	0	0	0	0	0	0	0	0	0	0		0	1	0	1	0	0	0	0	0	0	0	0	0	0	0	1	0	0	0	0	0	1	0	1	0	0	0	0	0	0
37		F	23.0164	3	1	1	1	0	0	0	0	0	0	0	0	1	0	0		1	1	1	1	1	1	1	1	1	0	1	1	1	0	0	1	0	1	1	1	1	0	1	0	1	1	1	1	1	1
38		F	26.5233	3	1	1	1	1	0	1	1	0	1	0	0	1	0	0		1	1	1	1	1	1	1	0	1	1	1	1	1	0	0	0	0	1	1	0	1	1	1	1	1	0	1	0	1	1
39		F	32.0438	3	1	0	1	1	0	0	1	0	1	0	0	0	1	0		1	1	1	1	1	1	1	0	1	0	1	0	0	0	0	0	0	1	1	1	1	0	1	1	1	1	1	1	1	1
40		F	47.1014	3	1	0	1	0	0	0	1	0	0	0	0	0	0	0		1	1	1	1	1	1	1	0	1	1	1	0	1	0	0	1	1	1	0	0	1	0	0	1	1	0	1	1	1	1
41		F	41.4	3	1	0	0	1	0	0	0	0	1	0	0	0	0	0		1	1	1	1	1	1	0	1	1	0	1	0	1	1	0	1	1	1	1	0	1	1	0	1	1	0	1	0	1	1
42		F	34.6904	1	1	1	0	0	0	1	1	0	0	0	0	1	0	0		1	1	1	1	1	1	1	1	1	0	1	0	1	1	1	1	0	1	1	0	1	1	1	1	1	1	1	1	1	1
43		M	31.9973	3	1	0	1	0	0	0	1	0	1	0	0	0	0	1		1	1	1	1	1	0	0	0	1	0	1	0	1	0	0	0	0	0	1	1	1	0	0	0	1	0	1	0	1	0
44		F	33.7589	2	1	0	1	1	1	0	1	0	0	0	0	1	1	0		1	1	1	1	1	1	1	0	0	1	1	1	1	0	0	1	0	1	1	1	1	0	1	1	1	1	1	1	1	1
45		F	31.4521	2	1	0	0	1	0	0	1	0	0	0	0	1	0	0		1	1	1	1	1	0	0	1	0	0	1	1	1	0	0	0	0	1	1	0	1	0	1	1	1	0	1	1	1	1
46		F	38.5342	3	1	1	0	0	0	0	0	0	0	0	0	0	0	1		1	1	1	1	0	1	1	1	1	0	0	0	1	0	0	0	0	0	0	1	0	0	0	0	0	1	0	0	1	1
47		M	22.9123	3	1	0	0	1	1	0	1	0	1	0	0	0	0	0		1	1	1	1	1	0	0	0	0	0	0	0	1	1	0	0	0	1	1	1	1	1	1	1	1	1	0	1	1	1
48		F	46.337	3	1	1	1	1	0	0	0	0	0	0	1	0	0	1		1	1	1	1	1	1	0	1	1	1	1	1	1	0	0	0	0	1	0	1	1	1	0	1	1	1	0	1	1	1
49		M	41.6849	1	0	0	0	0	0	1	1	0	0	0	0	1	0	1		1	0	1	1	1	1	0	1	1	0	1	0	1	1	0	0	1	1	0	1	1	0	0	1	1	0	0	1	1	0
50		F	62.7534	1	1	1	1	1	0	0	0	0	1	1	0	1	0	1		1	0	1	1	1	0	1	0	0	0	1	0	0	0	0	0	1	0	0	0	1	1	0	1	1	1	1	1	1	1
51		F	35.3726	1	1	0	1	1	1	0	1	1	0	0	0	0	0	1		1	1	1	1	1	1	0	1	1	1	1	0	1	0	0	1	0	1	0	0	1	0	1	1	1	0	0	0	1	1
52		F	22.4164	1	1	0	1	1	0	0	1	0	0	0	0	0	0	1		1	1	1	1	1	0	0	0	0	0	1	0	1	0	0	1	0	1	1	0	1	0	0	0	1	0	1	0	1	1
53		F	47.4027	3	1	0	1	0	1	1	0	0	1	1	0	0	0	0		1	1	1	1	1	1	0	0	1	1	1	0	1	1	0	1	0	0	1	0	0	1	0	0	1	0	1	1	1	1
54		F	40.5205	3	0	0	0	0	0	0	0	0	0	0	0	0	0	1		1	1	1	1	1	0	0	0	1	0	1	0	0	0	0	0	0	1	0	1	1	0	0	1	0	0	1	1	1	1
55		F	14.9507	3	1	0	1	1	0	0	1	1	0	0	0	1	1	0		1	1	1	1	1	1	1	1	1	1	1	1	1	0	0	1	0	1	1	1	1	0	1	1	1	1	1	1	1	1
56		F	48.2137	3	1	1	0	0	0	0	0	0	0	0	0	0	0	1		1	1	1	1	1	1	1	1	0	0	1	0	1	0	0	0	0	1	1	0	1	0	0	1	1	0	1	1	1	1
57		F	33.611	2	1	0	1	1	0	1	1	0	1	1	1	0	0	0		1	0	1	1	1	1	0	1	0	1	1	0	1	1	0	0	1	1	1	1	1	0	0	1	1	0	1	1	1	1
58		F	38.3288	1	1	0	0	0	1	0	0	0	1	0	0	0	0	1		1	0	1	1	1	1	0	1	1	1	1	0	0	0	0	0	0	1	1	1	1	0	0	1	1	0	1	1	1	1
59		F	62.411	3	1	0	0	1	0	1	0	0	1	0	1	0	0	0		1	1	1	1	1	1	0	1	1	0	1	0	1	0	0	1	0	1	0	0	1	0	0	1	1	0	1	1	1	1
60		M	38.1507	4	0	0	0	1	0	0	1	0	1	0	0	0	0	0		1	1	1	1	1	0	0	0	0	0	1	0	1	0	0	0	1	1	1	0	1	0	0	1	0	0	1	1	1	1
61		F	55.8	3	1	1	0	1	0	1	1	0	1	1	0	1	0	0		1	1	1	1	1	1	1	1	1	0	1	1	1	0	0	1	0	1	1	0	1	0	1	1	1	1	1	0	1	1
62		F	43.3671	3	1	0	1	1	0	1	1	0	0	0	0	0	0	0		1	1	1	1	1	1	1	1	0	0	1	0	1	0	0	1	0	1	1	1	1	1	0	1	1	0	1	1	1	1
63		F	17.0438	3	1	0	1	1	0	1	1	0	1	0	0	0	0	1		1	1	0	1	1	0	1	0	0	1	1	0	1	0	0	0	0	1	0	1	1	0	0	1	1	1	0	1	1	1
64		M	15.3068	1	1	0	0	0	0	0	0	0	0	0	0	0	0	0		1	0	1	1	1	0	0	0	0	0	1	0	1	0	0	0	0	1	1	0	1	0	1	0	0	0	1	0	1	1
65		F	42.6658	4	1	1	1	0	0	0	0	0	0	0	0	0	0	0		1	1	1	1	0	1	1	1	1	0	1	0	1	0	0	0	1	1	0	0	0	0	1	1	1	0	1	0	1	1
66		M	63.863	3	0	0	1	1	0	0	1	0	1	0	1	0	0	0		1	1	1	1	1	0	0	0	0	0	1	0	1	1	1	1	1	1	0	0	1	1	0	1	1	0	1	1	0	1
67		F	30.4164	3	1	0	1	1	0	1	1	0	0	0	0	1	1	0		1	1	1	1	1	1	1	1	1	0	1	0	1	0	0	1	0	1	1	1	1	0	0	1	1	0	1	1	1	1
68		F	41.3781	3	1	1	1	0	0	1	1	0	0	0	0	1	1	0		1	1	1	1	1	1	0	1	1	1	1	0	1	0	0	1	1	1	1	0	1	1	0	1	1	0	1	0	1	1
69		F	37.4192	3	1	1	0	0	0	0	0	0	0	0	0	0	0	0		1	1	1	1	1	1	1	0	0	0	1	0	1	0	0	0	0	1	0	1	1	1	1	1	1	1	1	1	1	1
70		F	28.6849	3	1	1	0	0	0	1	0	1	0	0	0	0	0	1		1	0	1	1	1	0	0	0	0	0	0	0	1	0	0	0	0	0	1	0	1	0	0	0	1	1	1	0	1	1
71		F	19.2329	3	1	0	0	0	0	0	0	0	0	0	0	0	0	0		1	1	0	0	1	0	0	0	0	0	0	0	0	0	0	0	0	0	0	0	0	0	0	0	0	0	0	0	0	0
72		F	17.5699	4	1	0	0	0	0	0	0	0	0	0	0	0	0	0		1	0	0	0	1	0	0	0	0	0	0	0	1	0	0	0	0	1	0	0	1	0	0	1	0	0	0	0	1	1
73		F	49.989	1	0	0	0	0	0	0	0	0	1	0	0	0	0	0		1	1	1	1	1	0	0	0	0	0	1	0	1	0	0	1	0	0	0	1	1	0	1	1	0	0	0	0	1	1
74		F	52.663	1	1	1	0	0	0	0	0	0	0	0	0	0	1	0		1	1	1	1	1	1	1	1	1	1	1	0	1	0	0	1	1	1	1	1	1	1	1	1	1	1	1	1	1	1
75		F	27.537	1	0	0	1	1	0	0	1	0	0	0	0	0	0	0		0	0	0	0	0	0	0	0	0	0	0	0	1	0	0	0	0	1	0	0	0	0	0	0	0	0	0	0	0	0
76		M	37.9836	3	1	0	1	0	0	1	1	0	1	1	1	1	1	0		1	1	1	1	1	1	1	1	0	0	1	0	1	0	0	0	0	1	1	1	1	0	0	1	1	0	1	0	1	1
77		F	47.5096	3	1	1	0	0	0	1	0	0	0	0	0	0	0	0		1	1	1	1	1	1	0	1	1	1	1	1	1	1	1	0	1	1	1	1	1	0	1	1	1	1	1	1	1	1
78		M	40.7342	3	0	0	1	1	1	0	0	0	1	1	0	0	0	0		1	1	1	1	1	1	1	1	1	0	1	0	1	1	0	0	1	1	1	0	1	0	0	1	1	0	1	1	1	1
79		M	38.0986	3	0	1	0	0	0	0	1	0	0	0	0	0	0	1		1	1	1	1	1	0	0	0	1	1	1	0	0	0	0	1	1	1	0	1	1	0	0	0	1	0	1	1	0	1
80		F	36.2685	3	0	0	0	0	0	0	0	0	0	0	0	0	0	0		0	0	0	0	0	0	0	0	0	0	0	0	1	0	0	0	0	1	1	0	0	0	0	0	1	0	0	0	1	0
81		F	16.9178	3	1	0	0	1	1	1	1	0	1	0	0	0	1	0		1	1	0	1	0	0	0	0	0	1	1	0	1	0	0	0	0	1	1	0	1	0	0	0	0	0	1	0	1	1
82		F	39.2548	2	1	0	1	0	0	1	1	0	1	0	0	1	0	0		1	1	1	1	1	0	0	0	0	0	1	0	1	1	1	1	0	1	1	1	1	0	0	1	1	0	1	1	1	1
83		F	29.4575	3	1	0	0	1	0	0	1	0	0	0	0	0	1	0		1	1	1	0	0	0	0	0	0	0	1	1	1	0	0	0	0	1	1	0	0	0	0	0	0	0	0	1	1	1
84		F	25.1425	1	0	1	0	0	0	0	0	0	0	0	0	0	0	0		1	1	1	1	1	0	0	0	1	0	0	0	1	0	0	0	0	0	0	0	1	1	1	1	1	0	0	1	1	1
85		F	21.7616	2	0	0	0	0	0	0	1	0	0	0	0	0	1	0		1	0	1	1	1	0	0	0	0	0	1	0	0	0	0	1	0	1	1	0	1	0	0	0	0	0	1	1	1	1
86		F	25.8137	4	1	0	1	0	0	0	1	1	0	0	0	0	0	0		1	1	1	1	1	1	1	0	1	1	1	1	1	0	0	1	1	1	1	1	1	1	1	1	1	1	1	1	1	1
87		F	43.7726	3	0	1	0	0	0	0	0	0	0	0	0	0	0	0		1	1	1	1	1	0	0	0	1	0	0	1	1	0	0	1	0	0	1	0	1	0	0	1	0	0	1	0	0	1
88		F	22.8247	3	1	0	1	1	0	1	1	1	0	1	1	0	0	0		1	1	1	1	1	1	1	1	1	1	1	1	1	0	0	1	1	1	1	1	1	1	1	1	1	1	1	1	1	1
89		F	31.5836	1	1	0	1	0	0	0	0	0	0	0	0	0	0	1		1	0	1	1	1	1	0	0	0	1	1	0	1	0	0	0	0	0	1	0	1	0	0	1	1	0	0	1	1	1
90		F	23.1562	4	1	0	1	1	0	0	1	0	0	0	0	0	0	1		1	0	1	1	1	1	1	1	1	1	0	0	1	0	0	0	1	1	1	1	1	1	1	1	1	0	1	1	1	1
91		F	46.8247	1	0	0	0	0	0	0	0	0	0	0	0	0	0	1		1	0	0	1	1	1	0	0	1	0	0	0	1	0	0	1	0	0	0	1	1	1	0	1	1	0	1	1	1	0
92		M	31.8493	4	1	0	0	1	0	0	1	0	0	0	0	0	1	0		1	1	1	0	1	1	1	1	0	0	1	1	1	0	0	0	0	1	1	0	1	1	0	1	0	0	0	0	1	1
93		F	42.6164	3	1	1	0	0	0	0	0	0	0	0	0	1	0	0		1	1	1	1	1	1	1	1	1	1	1	0	1	0	0	1	0	0	1	0	1	1	1	1	1	1	1	1	1	1
94		F	41.0466	3	0	0	0	1	0	1	1	0	1	0	1	0	0	0		1	1	1	1	1	1	1	1	0	0	1	1	1	0	0	1	1	1	1	0	1	1	1	1	1	1	1	0	1	1
95		F	33.5452	3	1	0	0	1	1	1	1	0	0	0	0	0	1	1		1	1	1	1	0	1	0	1	1	1	1	1	1	0	0	0	0	0	1	0	1	1	1	1	1	0	1	0	1	1
96		F	26.3726	2	1	0	1	0	1	0	1	0	1	0	0	0	0	1		1	1	0	1	1	0	0	0	0	0	1	0	1	0	0	0	0	1	1	1	1	1	0	1	1	0	1	1	0	0
97		F	42.4849	3	1	0	1	1	0	0	1	0	1	0	1	0	0	0		1	0	0	1	1	0	0	0	0	0	1	0	1	0	0	1	0	1	0	1	1	0	0	1	0	1	1	0	1	1
98		F	29.9671	1	1	1	0	0	0	1	1	0	0	0	0	0	0	0		1	1	1	1	1	1	1	1	0	1	1	1	1	0	0	0	0	1	0	1	1	0	1	1	1	1	0	0	1	1
99		F	41.6767	1	1	0	0	0	0	0	0	0	0	0	0	0	0	0		1	1	1	1	1	1	0	1	1	0	1	0	1	1	1	0	0	1	0	0	1	0	0	1	0	0	0	1	1	0
100		F	57.8493	2	1	1	1	1	0	1	0	0	0	1	0	1	1	1		1	1	1	1	1	1	1	1	1	1	1	0	1	1	1	1	1	1	0	1	1	0	1	1	0	0	1	1	1	1
101		F	23.2356	3	1	0	0	1	0	0	1	0	0	0	0	0	0	0		1	1	1	1	1	0	0	0	1	1	0	0	1	0	0	0	0	1	1	1	1	0	0	1	0	0	0	1	1	1
102		F	29.9233	3	1	1	1	0	0	0	1	0	1	0	0	1	0	1		1	1	1	1	1	1	1	0	1	1	1	1	1	0	0	0	0	1	1	1	1	0	0	1	0	0	1	0	1	1
103		F	42.1507	2	1	0	0	1	1	0	1	0	1	1	0	0	0	0		1	1	1	1	1	0	0	0	1	0	1	0	1	0	0	1	0	0	0	0	1	0	0	0	1	0	1	1	1	1
104		F	44.3151	1	1	0	1	1	0	0	1	0	0	0	1	1	0	0		1	0	1	1	1	0	0	0	0	0	1	1	1	1	0	1	0	0	0	1	1	0	1	1	1	0	1	1	1	1
105		F	33.7973	1	1	1	0	0	0	1	0	0	0	0	0	0	0	0		1	1	1	1	1	1	1	1	1	1	1	1	1	0	0	1	0	1	1	1	1	1	1	1	1	1	1	1	1	1
106		F	54.5342	2	0	1	0	0	0	0	0	0	0	0	0	1	1	0		1	1	1	1	1	1	1	1	1	1	1	0	1	0	0	1	1	1	1	1	1	1	1	1	1	0	1	1	1	1
107		F	30.0192	2	1	1	1	1	0	1	1	0	1	1	0	0	0	0		1	0	1	1	1	1	0	1	1	1	1	0	1	1	0	1	1	1	1	0	1	0	1	1	1	0	1	1	1	1
108		F	28.6822	4	1	0	0	1	0	1	1	0	0	0	0	0	1	0		1	1	1	1	1	1	0	1	0	1	1	1	1	1	0	0	1	1	1	1	1	0	0	1	0	0	1	1	1	1
109		F	54.0329	1	1	1	1	1	0	1	0	0	0	1	0	1	1	0		1	1	1	1	1	1	0	0	1	1	1	0	1	1	1	1	1	1	1	1	1	0	1	1	1	0	1	1	1	1
110		F	60.4521	3	0	0	0	0	0	0	0	0	1	0	0	0	0	0		1	1	1	1	0	0	0	0	0	0	1	0	1	1	0	1	1	1	0	0	0	0	0	0	0	0	1	0	1	1
111		F	47.4575	3	1	1	1	0	0	1	1	0	0	0	0	0	0	0		1	0	1	1	1	0	0	0	0	0	1	0	1	0	0	1	0	1	0	1	1	0	1	1	1	0	1	0	1	1
112		F	27.4849	3	1	0	0	1	0	0	1	0	0	0	0	0	1	0		1	1	1	1	1	1	1	1	1	1	1	1	1	0	0	0	0	1	1	1	1	0	0	1	1	0	1	1	1	1
113		F	57.2192	1	1	0	0	1	0	1	1	0	0	0	0	0	0	0		1	1	1	1	1	1	0	0	1	1	0	0	1	0	0	1	0	1	1	0	1	0	0	1	1	0	1	1	1	1
114		F	50.7479	3	1	0	0	0	0	0	0	0	0	0	0	0	0	1		1	1	1	1	1	1	1	0	1	0	1	0	1	0	0	1	0	0	1	0	1	1	0	1	1	0	1	1	1	1
115		F	23.0301	1	1	0	0	0	0	0	0	0	0	0	0	0	0	0		1	1	1	1	0	1	1	1	1	0	1	0	0	0	0	0	0	0	1	1	1	0	1	1	1	0	1	1	1	1
116		F	37.4411	1	1	1	1	1	1	0	1	0	1	0	0	0	0	0		1	0	0	0	1	1	0	0	1	1	1	0	1	0	0	0	0	0	1	1	1	0	0	0	1	0	1	0	1	1
117		F	28.8822	3	1	0	1	1	0	1	1	0	1	0	1	0	0	0		1	1	0	1	1	1	1	0	1	0	1	1	1	0	0	0	1	1	0	1	1	0	0	1	1	0	0	0	1	1
118		F	35.7397	3	1	1	1	1	0	1	1	0	0	0	0	0	0	1		1	0	0	1	1	1	0	1	1	0	1	0	1	0	0	0	0	1	0	0	1	0	1	1	1	0	1	1	1	0
119		F	45.2493	4	1	1	1	0	0	0	1	0	0	0	0	0	0	0		1	1	1	1	1	1	1	0	1	1	1	0	1	0	0	0	0	1	1	1	1	0	1	1	1	0	1	1	1	1
120		F	35.3836	4	0	0	0	0	1	0	0	0	1	0	1	0	0	0		1	1	0	1	1	1	0	1	0	0	1	0	1	0	0	0	0	1	0	1	1	1	1	1	1	0	1	1	1	1
121		M	22.2685	4	0	0	0	0	0	0	0	0	0	0	0	0	0	0		1	1	1	1	1	0	0	0	0	0	1	0	0	0	0	0	0	0	1	0	1	0	1	1	0	0	1	1	0	1
122		F	46.9014	3	1	1	0	0	0	0	0	0	0	0	0	0	0	0		1	1	1	1	1	1	1	1	0	1	1	0	1	0	0	1	0	1	1	1	1	0	0	1	1	0	1	1	1	1
123		F	59.5863	1	0	0	0	1	0	1	0	0	1	0	0	0	0	0		1	1	0	1	1	1	0	1	0	0	1	0	1	0	0	1	0	1	1	1	1	0	0	1	1	0	1	1	1	1
124		M	25.2192	1	0	0	0	1	1	0	1	0	1	0	0	0	0	0		1	1	1	1	1	1	1	1	1	0	1	0	1	0	0	1	1	1	1	1	1	1	0	0	1	0	0	1	1	1
125		F	41.0917	1	1	0	1	1	0	1	1	0	1	1	0	1	0	1		1	1	1	1	1	1	1	0	1	1	1	0	1	1	0	1	1	1	1	1	1	1	0	1	1	0	1	1	1	1
126		F	23.9096	3	1	0	1	0	0	1	1	0	1	0	0	0	0	0		1	1	1	1	1	0	0	0	0	1	1	0	1	0	0	0	1	1	0	1	1	0	1	1	1	0	1	0	1	1
127		F	53.5288	4	1	0	1	1	0	1	1	0	1	1	1	0	0	0		1	1	0	1	1	1	0	1	0	0	1	0	1	0	0	0	0	0	0	1	1	1	1	1	1	0	0	1	1	1
128		F	32.5945	3	1	0	0	0	0	1	1	0	0	1	0	0	0	0		1	1	1	1	1	1	0	1	0	0	1	0	1	0	0	1	0	1	0	0	1	1	1	1	0	0	1	1	1	1
129		F	38.3973	1	1	1	1	0	0	0	0	0	0	1	0	0	0	1		1	1	1	1	1	1	0	1	1	0	1	0	1	0	0	0	1	0	0	1	1	0	1	1	0	0	1	1	1	1
130		F	29.8301	1	0	0	0	1	0	0	0	0	1	0	1	0	0	0		0	1	1	1	1	0	0	0	0	0	0	0	1	0	0	0	0	0	1	0	1	0	0	0	0	0	0	0	1	1
131		F	43.926	1	1	0	0	1	0	0	1	0	1	0	1	0	0	1		1	1	1	1	1	1	1	1	1	0	1	0	1	1	1	1	0	0	0	1	1	0	1	1	1	0	1	0	0	0
132		F	36.9945	3	1	0	0	1	0	0	1	0	0	0	0	0	0	0		1	1	1	1	1	1	1	1	1	1	1	0	1	0	0	0	0	1	1	1	1	1	1	1	1	1	1	1	1	1
133		F	28.1342	3	0	0	0	1	0	0	1	0	1	0	0	0	0	0		1	1	1	1	1	1	1	1	1	1	1	0	1	0	0	0	0	1	1	1	1	0	0	1	0	1	1	1	1	1
134		F	47.2274	3	0	0	1	0	0	0	0	0	1	0	0	0	0	0		1	1	1	1	1	1	0	0	0	0	0	0	1	0	0	0	0	1	1	0	1	0	0	0	0	0	0	0	1	1
135		F	19.2921	1	1	1	1	0	0	0	0	0	0	0	0	0	0	0		1	1	1	1	1	1	1	0	0	0	0	0	1	0	0	1	0	0	0	0	1	0	1	1	1	0	0	1	1	1
136		F	16.2192	1	0	0	1	0	0	0	1	0	1	0	0	0	0	0		1	1	1	1	1	0	1	0	0	0	1	0	1	0	0	0	0	0	1	0	1	0	0	1	0	0	1	0	1	1
137		F	45.6767	3	1	0	1	1	0	1	1	0	0	1	1	0	1	1		1	1	1	1	1	1	0	1	1	0	1	0	1	0	0	1	1	1	0	1	1	1	0	1	1	0	1	1	1	1
138		F	49.4521	3	1	0	1	1	0	1	1	0	1	0	1	0	0	0		1	1	1	1	1	0	0	0	1	0	1	1	1	0	0	0	0	1	1	0	1	1	0	1	0	0	1	0	1	1
139		F	41.2082	3	1	1	0	0	0	0	0	0	0	0	0	0	0	0		1	1	1	1	1	0	0	0	0	0	0	0	1	1	0	1	0	1	0	0	1	0	1	1	1	0	1	0	1	1
140		M	46.7534	3	0	0	0	0	0	0	0	0	0	0	0	0	0	1		0	0	0	1	1	1	1	1	1	1	1	0	0	0	0	1	0	0	0	0	1	1	1	1	1	0	0	1	0	1
141		F	61.8027	1	1	1	0	0	1	1	0	0	0	0	0	0	0	1		1	1	1	1	1	1	1	0	1	0	1	1	1	0	0	0	1	1	1	1	1	0	0	1	1	0	1	1	1	1
142		F	32.7452	3	1	0	1	0	0	0	0	0	0	1	0	0	0	0		0	1	0	1	1	0	0	0	0	1	1	0	1	0	0	0	0	0	1	0	0	0	1	1	1	1	1	1	1	1
143		F	44.7808	3	0	0	1	1	0	1	1	0	1	0	0	1	1	0		1	0	1	1	1	1	1	1	0	0	1	0	1	1	0	1	1	1	1	1	1	1	0	1	0	1	0	0	1	1
144		F	50.937	3	1	0	1	0	0	1	0	0	0	1	0	0	0	0		1	1	1	1	1	1	0	1	0	0	1	1	1	0	0	0	0	1	1	1	1	1	1	1	1	1	0	1	1	1
145		F	30.0959	3	1	0	0	1	0	1	1	0	1	0	0	1	1	0		1	1	1	1	1	1	1	1	0	0	1	0	1	1	1	1	0	0	0	0	1	1	0	1	0	0	1	0	1	1
146		F	40.5452	1	1	0	0	1	0	1	1	0	0	0	0	0	0	0		1	1	0	1	0	0	0	0	1	0	1	0	0	0	0	0	0	1	1	0	0	1	0	1	1	0	0	1	0	1
147		F	45.5425	1	1	1	1	0	0	0	1	0	0	0	0	1	0	0		1	1	1	1	0	0	0	0	0	0	0	0	0	0	0	1	0	0	0	1	1	0	0	0	0	0	1	0	1	0
148		M	33.2329	3	1	1	1	0	1	1	0	0	0	0	0	0	0	0		1	1	1	1	1	0	0	0	1	0	0	0	1	1	1	1	1	0	1	0	1	0	1	1	1	0	1	1	1	1
149		F	41.3781	3	1	1	0	0	0	0	0	0	0	0	0	0	0	1		1	1	1	1	1	0	0	0	1	0	1	0	1	0	0	1	1	0	0	0	1	0	0	1	1	1	1	1	1	1
150		F	39.7178	3	1	0	0	0	0	0	1	0	1	0	0	0	0	0		1	1	1	1	1	0	0	0	0	1	1	0	1	0	0	0	0	1	0	0	1	0	0	1	1	1	0	1	0	1
151		F	53.8247	3	1	1	0	0	0	0	1	0	1	0	0	0	0	0		1	0	1	1	1	1	1	0	0	1	1	0	1	0	0	0	0	1	0	1	1	0	0	1	0	1	1	1	1	1
152		F	27.2904	3	1	0	1	1	0	1	1	0	0	0	0	1	1	0		1	1	1	1	1	1	1	0	0	1	1	1	1	0	0	0	0	1	1	1	1	1	0	1	1	0	1	1	1	1
153		F	33.2548	1	0	0	0	1	0	0	1	0	1	0	0	0	0	0		1	0	0	1	1	0	0	0	0	0	1	0	1	0	0	0	0	1	1	0	1	1	0	1	0	1	1	1	1	1
154		M	15.4274	1	1	1	1	0	0	0	0	0	0	0	0	1	0	1		1	1	1	1	1	1	1	1	1	1	1	1	1	1	1	1	1	1	1	1	1	0	1	1	1	1	1	1	1	1
155		F	32.411	3	1	1	1	1	0	1	1	0	1	1	1	0	0	1		1	1	1	1	1	0	0	0	1	1	1	1	1	0	0	0	0	1	1	1	1	1	0	0	1	0	0	1	1	0
156		F	45.0959	1	1	1	1	1	0	1	1	0	1	1	0	1	1	1		1	1	1	1	1	1	0	1	1	0	1	0	1	0	1	0	1	1	1	0	1	1	0	1	0	0	1	1	1	0
157		M	35.5068	3	1	0	1	1	0	0	0	0	1	0	0	0	0	0		1	0	0	0	1	1	0	0	0	0	1	0	1	0	0	0	0	1	1	0	1	0	0	0	0	0	0	0	1	0
158		F	42.9507	3	1	1	1	1	0	0	1	0	1	0	0	0	0	0		1	1	0	1	1	0	0	0	1	1	1	0	1	0	0	1	0	1	1	0	1	0	0	1	1	0	1	1	1	1
159		F	51.5753	3	0	0	0	1	0	0	1	0	1	1	1	0	0	1		1	0	0	1	1	1	0	1	0	1	1	0	1	1	1	1	0	1	1	1	1	1	1	1	1	1	1	1	1	1
160		F	28.9178	3	1	1	1	1	0	1	1	1	0	0	1	0	0	0		1	1	1	1	1	1	0	1	0	1	1	0	1	0	0	0	0	1	1	1	1	0	1	1	1	0	1	1	1	1
161		F	36.6411	4	1	1	0	1	0	0	1	0	0	0	0	0	0	0		1	1	1	1	1	1	1	0	1	0	1	0	1	0	0	1	0	1	0	0	1	1	0	1	1	0	1	1	0	1
162		M	42.4712	3	1	1	0	1	0	1	1	0	1	1	0	1	0	0		1	1	0	1	1	1	1	1	0	0	0	0	0	0	0	1	0	1	1	1	1	0	0	1	0	0	0	1	0	0
163		F	21.2219	3	1	0	1	0	0	0	1	0	0	0	0	0	0	0		1	0	0	1	1	1	0	1	1	0	1	1	1	0	0	0	0	1	0	0	0	0	1	1	0	1	1	0	1	1
164		F	30.8356	3	0	0	1	0	0	0	0	0	0	0	0	0	0	0		1	1	1	0	1	1	1	1	1	0	1	1	1	1	0	0	0	1	1	1	1	1	1	1	1	0	1	1	1	1
165		F	25.0493	3	1	0	0	0	0	1	1	0	1	0	0	0	0	0		1	1	1	1	1	0	0	0	0	0	1	0	1	0	0	0	0	0	1	0	1	0	1	0	0	0	0	1	1	0
166		F	35.9425	1	1	0	0	0	0	0	0	0	0	0	0	0	0	0		1	0	0	1	0	0	0	0	0	0	0	0	0	0	0	1	0	0	0	0	1	1	0	1	1	0	0	1	1	1
167		F	29.4247	3	1	0	1	1	1	1	1	0	0	1	0	0	0	0		1	1	1	1	1	0	0	0	0	0	1	1	1	0	0	0	0	1	1	1	1	1	1	1	1	0	1	0	1	1
168		F	43.0438	1	1	0	0	1	0	0	1	0	0	0	0	0	0	0		1	1	1	1	1	0	0	0	1	0	1	0	1	1	1	1	1	1	1	0	1	1	1	1	0	0	1	1	1	1
169		F	23.7288	3	0	1	1	0	0	0	0	0	0	0	0	0	0	0		1	1	1	1	1	1	1	1	0	1	1	1	1	1	0	1	0	1	1	0	1	1	0	1	1	0	1	1	1	1
170		F	36.3425	4	1	0	0	0	0	1	1	0	0	0	0	0	1	0		1	1	1	1	1	1	0	1	0	0	1	1	1	0	0	0	0	1	0	0	1	0	1	1	1	0	0	1	1	1
171		F	27.2192	3	1	0	1	1	0	0	1	0	0	0	0	0	1	0		1	1	1	1	1	1	1	1	1	1	1	1	1	1	0	1	1	1	1	1	1	1	1	1	1	0	1	1	1	1
172		F	42.926	3	1	1	0	1	0	0	0	0	0	0	1	1	0	0		1	1	1	1	1	0	0	0	0	0	1	0	1	0	0	0	0	0	0	0	1	0	0	0	0	1	0	0	1	1
173		F	15.7671	3	1	0	1	1	0	1	0	0	0	0	0	0	0	0		1	0	0	1	1	1	1	1	1	1	1	0	1	0	0	1	0	1	1	0	1	1	1	1	1	1	1	1	1	1
174		F	47.5385	1	1	0	0	0	0	1	1	0	0	0	1	1	0	1		1	1	1	0	1	1	0	1	1	0	1	0	1	0	0	0	0	1	1	1	1	0	1	1	1	1	0	1	1	1
175		F	23.4438	1	0	0	0	0	0	0	0	0	0	0	0	0	0	0		1	1	1	1	1	0	0	0	1	1	1	0	1	0	0	0	0	0	1	0	1	0	0	1	1	0	1	1	1	1
176		F	22.8849	3	0	0	0	0	1	0	1	0	0	0	0	1	0	0		1	1	1	1	1	1	0	1	1	0	1	0	1	0	0	0	0	1	0	1	1	0	1	1	0	1	1	0	1	0
177		F	24.0849	1	0	0	0	0	0	0	0	0	1	0	1	0	0	0		1	1	1	1	1	1	1	0	1	0	1	0	1	1	0	1	0	1	0	0	1	0	1	1	0	1	1	0	1	1
178		F	23.5671	1	1	1	1	1	0	0	0	0	0	0	0	0	0	0		1	1	1	1	0	0	0	0	0	0	0	0	0	1	0	1	1	0	1	1	0	0	0	0	0	0	0	0	0	1
179		F	29.4137	3	1	0	1	1	0	1	1	1	0	0	1	0	0	1		1	1	1	1	1	1	1	0	1	1	1	1	1	0	0	1	0	1	1	1	1	1	1	1	1	0	1	1	1	1
180		F	17.0137	1	1	0	0	1	0	1	1	1	0	0	0	0	1	0		1	0	0	0	1	1	0	1	0	0	1	0	1	0	0	0	0	1	1	0	0	0	1	1	1	1	0	0	1	1
181		F	20.663	3	1	1	0	0	0	1	1	1	0	0	0	0	0	0		1	1	1	1	0	0	0	0	0	0	0	0	1	0	0	0	0	1	1	0	1	0	0	0	1	0	0	0	1	1
182		F	40.1507	4	1	1	0	0	0	0	1	1	1	0	0	0	0	1		1	0	0	1	1	1	1	1	1	0	1	1	1	1	0	1	0	1	1	0	1	0	0	1	0	0	1	0	1	1
183		M	33.8767	1	0	0	0	0	0	0	0	0	0	0	0	0	0	0		1	1	1	1	1	1	1	1	1	0	1	0	1	1	0	0	1	1	1	1	1	0	0	1	1	0	0	1	1	1
184		F	32.4466	4	1	0	0	0	0	0	1	0	0	0	0	0	0	0		1	0	0	0	0	1	1	1	1	1	1	0	1	1	0	0	0	1	1	0	1	0	0	1	1	0	1	0	1	1
185		F	19.9014	3	1	0	0	1	0	0	1	0	1	0	0	0	0	0		1	0	1	1	1	1	1	0	1	0	1	0	1	0	0	0	0	1	1	0	1	0	0	1	1	0	1	1	1	1
186		F	43.8274	3	1	0	0	0	0	0	0	0	0	0	0	0	0	0		1	0	1	1	1	1	0	1	0	0	1	0	1	0	0	0	0	1	0	0	0	0	0	0	1	0	1	1	1	1
187		F	27.474	1	0	0	0	0	0	0	1	0	0	0	0	0	0	0		1	1	1	1	1	0	0	0	1	1	1	0	1	0	0	1	0	1	1	0	1	0	0	1	0	0	0	1	1	1
188		F	39.8493	3	1	0	0	1	0	0	1	0	1	0	0	0	1	0		1	1	1	1	1	1	1	1	1	1	1	0	1	0	0	1	1	1	1	1	1	0	1	1	1	0	1	1	1	1
189		F	27.6575	1	0	1	1	0	0	1	1	0	0	0	0	0	0	0		1	1	1	1	1	0	0	0	1	0	1	0	1	0	0	0	0	0	0	0	1	0	0	1	1	0	0	0	1	1
190		F	26.6137	3	1	1	0	1	0	1	1	0	0	0	0	1	0	1		1	1	1	1	1	1	1	1	1	1	1	1	1	0	0	0	0	1	1	1	1	0	1	1	1	0	1	1	1	1
[truncated: 201 more columns]
