# Supplementary material for: Surgical Screening Protocol for Craniocervical Instability Secondary to Ehlers-Danlos Syndrome and other Connective Tissue Disorders: Analysis of a 347 Patient Case Series
Source: Research Square preprint supplement (doi:10.21203/rs.3.rs-7675903/v1), 2025-12-03
Supplement: Supplementary file 4 [file 7a49b892d28cf381fcfc7083.docx]

**Supplementary Table 6: Detailed Stratification of Sub-Cohort 4 (n = 20) by Individual Outcomes**

- **Patients undergoing CCF surgery elsewhere (n = 4)**
  - 3 reported a good postoperative outcome
  - 1 reported a mostly positive postoperative outcome
- **Patients who booked CCF surgery at our center but cancelled (n = 6)**
  - 2 cancelled due to denial of insurance coverage
  - 3 cancelled due to socio-economic reasons
  - 1 cancelled citing “not ready”
- **Patients interested in CCF surgery but unable to proceed (n = 3)**
  - 1 developed severe problems with Median Arcuate Ligament Syndrome (MALS)
  - 1 was hospitalized for a severe psychotic episode
  - 1 was later lost to follow-up
- **Patients opting for conservative management (n = 3)**
  - 1 primarily affected by horizontal CCI
  - 1 pursued stem cell therapy
  - 1 later developed severe Tethered Cord Syndrome
- **Patients lost to follow-up after completing ICT (n = 4)**
