# Supplementary material for: Surgical Screening Protocol for Craniocervical Instability Secondary to Ehlers-Danlos Syndrome and other Connective Tissue Disorders: Analysis of a 347 Patient Case Series
Source: Research Square preprint supplement (doi:10.21203/rs.3.rs-7675903/v1), 2025-12-03
Supplement: Supplementary file 5 [file 8cd0b0576c742ff195bc885d.docx]

| **Pt #** | **Subgroup** | **Which best represents your feelings?** |
| --- | --- | --- |
| 1 | 2 | Treatment met expectations |
| 2 | 2 | Did not improve as hoped; would undergo again for same outcome |
| 3 | 2 | Treatment met expectations |
| 4 | 2 | Did not improve as hoped; would undergo again for same outcome |
| 5 | 2 | Treatment met expectations |
| 6 | 2 | Did not improve as hoped; would undergo again for same outcome |
| 7 | 2 | Treatment met expectations |
| 8 | 2 | Did not improve as hoped; would undergo again for same outcome |
| 9 | 2 | Did not improve as hoped; would NOT undergo again for same outcome |
| 10 | 2 | Treatment met expectations |
| 11 | 3 | Treatment met expectations |
| 12 | 3 | Did not improve as hoped; would NOT undergo again for same outcome |
| 13 | 3 | Treatment met expectations |
| 14 | 3 | Did not improve as hoped; would undergo again for same outcome |
| 15 | 3 | Treatment met expectations |
| 16 | 3 | Did not improve as hoped; would undergo again for same outcome |
| 17 | 3 | Did not improve as hoped; would undergo again for same outcome |
| 18 | 3 | Did not improve as hoped; would undergo again for same outcome |
| 19 | 3 | Same or worse than before |
| 20 | 3 | Did not improve as hoped; would undergo again for same outcome |
| 21 | 3 | Did not improve as hoped; would undergo again for same outcome |
| 22 | 3 | Treatment met expectations |
| 23 | 3 | Treatment met expectations |
| 24 | 3 | Treatment met expectations |
| 25 | 3 | Treatment met expectations |
| 26 | 3 | Treatment met expectations |
| 27 | 3 | Treatment met expectations |
| 28 | 3 | Did not improve as hoped; would undergo again for same outcome |
| 29 | 3 | Treatment met expectations |
| 30 | 3 | Treatment met expectations |
| 31 | 3 | Did not improve as hoped; would undergo again for same outcome |
| 32 | 3 | Did not improve as hoped; would NOT undergo again for same outcome |
| 33 | 3 | Did not improve as hoped; would undergo again for same outcome |
| 34 | 3 | Treatment met expectations |
| 35 | 3 | Did not improve as hoped; would undergo again for same outcome |
| 36 | 3 | Did not improve as hoped; would undergo again for same outcome |
| 37 | 3 | Treatment met expectations |
| 38 | 3 | Treatment met expectations |
| 39 | 3 | Did not improve as hoped; would NOT undergo again for same outcome |
| 40 | 3 | Treatment met expectations |
| 41 | 3 | Treatment met expectations |
| 42 | 3 | Treatment met expectations |
| 43 | 3 | Treatment met expectations |
| 44 | 3 | Did not improve as hoped; would NOT undergo again for same outcome |
| 45 | 3 | Did not improve as hoped; would undergo again for same outcome |
| 46 | 3 | Did not improve as hoped; would undergo again for same outcome |
| 47 | 3 | Did not improve as hoped; would undergo again for same outcome |
| 48 | 3 | Did not improve as hoped; would undergo again for same outcome |
| 49 | 3 | Treatment met expectations |
| 50 | 3 | Treatment met expectations |
| 51 | 3 | Treatment met expectations |
| 52 | 3 | Same or worse than before |
| 53 | 3 | Did not improve as hoped; would undergo again for same outcome |
| 54 | 3 | Did not improve as hoped; would undergo again for same outcome |
| 55 | 3 | Treatment met expectations |
| 56 | 3 | Did not improve as hoped; would NOT undergo again for same outcome |
| 57 | 3 | Did not improve as hoped; would undergo again for same outcome |
| 58 | 3 | Treatment met expectations |
| 59 | 3 | Treatment met expectations |
| 60 | 3 | Did not improve as hoped; would undergo again for same outcome |
| 61 | 3 | Treatment met expectations |
| 62 | 3 | Did not improve as hoped; would undergo again for same outcome |
| 63 | 3 | Treatment met expectations |
| 64 | 3 | Did not improve as hoped; would undergo again for same outcome |
| 65 | 3 | Did not improve as hoped; would undergo again for same outcome |
| 66 | 3 | Did not improve as hoped; would NOT undergo again for same outcome |
| 67 | 3 | Did not improve as hoped; would undergo again for same outcome |
| 68 | 3 | Did not improve as hoped; would undergo again for same outcome |
| 69 | 3 | Treatment met expectations |
| 70 | 3 | Treatment met expectations |
| 71 | 3 | Did not improve as hoped; would NOT undergo again for same outcome |
| 72 | 3 | Did not improve as hoped; would undergo again for same outcome |
| 73 | 3 | Treatment met expectations |
| 74 | 3 | Did not improve as hoped; would undergo again for same outcome |
| 75 | 3 | Did not improve as hoped; would undergo again for same outcome |
| 76 | 3 | Did not improve as hoped; would undergo again for same outcome |
| 77 | 3 | Treatment met expectations |
| 78 | 3 | Treatment met expectations |
| 79 | 3 | Treatment met expectations |
| 80 | 3 | Treatment met expectations |
| 81 | 3 | Did not improve as hoped; would undergo again for same outcome |
| 82 | 3 | Did not improve as hoped; would undergo again for same outcome |
| 83 | 3 | Same or worse than before |
| 84 | 3 | Did not improve as hoped; would undergo again for same outcome |
| 85 | 3 | Did not improve as hoped; would NOT undergo again for same outcome |
| 86 | 3 | Treatment met expectations |
| 87 | 3 | Did not improve as hoped; would undergo again for same outcome |
| 88 | 3 | Treatment met expectations |
| 89 | 2 | Treatment met expectations |
| 90 | 2 | Treatment met expectations |
| 91 | 2 | Same or worse than before |
| 92 | 2 | Did not improve as hoped; would undergo again for same outcome |
| 93 | 2 | Did not improve as hoped; would undergo again for same outcome |
| 94 | 2 | Did not improve as hoped; would undergo again for same outcome |
| 95 | 2 | Treatment met expectations |
| 96 | 2 | Same or worse than before |
| 97 | 2 | Same or worse than before |
| 98 | 2 | Treatment met expectations |
|  |  |  |
|  |  | **NASS metric** |
|  | 44 | Treatment met expectations |
|  | 39 | Did not improve as hoped; would undergo again for same outcome |
|  | 9 | Did not improve as hoped; would NOT undergo again for same outcome |
|  | 6 | Same or worse than before |

Post-operative outcomes of individuals electing craniocervical fusion surgery, assessed using the North American Spine Surgery Satisfaction Index [1].

 Outcome data were obtained from 10 individuals in Subgroup 2 (83% response rate) and 88 individuals in Subgroup 3 (93% response rate).

Reference:

1. Mummaneni PV, Bydon M, Alvi MA, et al. Predictive model for long-term patient satisfaction after surgery for grade I degenerative lumbar spondylolisthesis: insights from the Quality Outcomes Database. Neurosurg Focus. May 1 2019;46(5):E12. doi:10.3171/2019.2.FOCUS18734
