# Supplementary material for: Surgical Screening Protocol for Craniocervical Instability Secondary to Ehlers-Danlos Syndrome and other Connective Tissue Disorders: Analysis of a 347 Patient Case Series
Source: Research Square preprint supplement (doi:10.21203/rs.3.rs-7675903/v1), 2025-12-03
Supplement: Supplementary file 6 [file 96f9e0de43daa933571fb387.docx]

**Psychiatric Clearance Questions**

*The psychiatric clearance evaluations addressed the following six questions:*

1. ***Symptom perception:*** *Is the patient’s current mental health status interfering with an accurate perception of their symptoms?*
2. ***Mental health optimization:*** *Does any aspect of the patient’s mental health require treatment or optimization prior to the planned evaluation or potential surgery?*
3. ***Expectations:*** *Does the patient have realistic expectations regarding the upcoming evaluation or potential surgery?*
4. ***Psychological readiness:*** *Is the patient psychologically prepared to tolerate the stress associated with surgery and perioperative care, if indicated?*
5. ***Active participation:*** *Is the patient able to actively engage in the healing process should surgery be performed?*
6. ***Support system:*** *Does the patient have a reliable support network to assist during recovery after the procedure or surgery, if indicated?*
