# Supplementary material for: Surgical Screening Protocol for Craniocervical Instability Secondary to Ehlers-Danlos Syndrome and other Connective Tissue Disorders: Analysis of a 347 Patient Case Series
Source: Research Square preprint supplement (doi:10.21203/rs.3.rs-7675903/v1), 2025-12-03
Supplement: Supplementary file 7 [file bed8881f1625a95a812a28a3.docx]

**ICT Procedure Protocol additional details**

Gardner-Wells tongs were applied using a standard technique following administration of local anesthetic (a 1:1 mixture of lidocaine and bupivacaine, maximum total volume 20 mL) and a short burst of propofol sedation in the operating room. Propofol was selected for its rapid onset and short duration of action. Doses were titrated to effect, accounting for variability in metabolic rates commonly observed in this patient population. No additional sedatives or analgesics were administered to avoid confounding the subsequent clinical assessment.

After propofol effects had completely dissipated and the patient returned to baseline, the patient was positioned upright. Using a calibrated digital fluoroscope (calibration procedure described below), we obtained lateral-view images of the cranio-cervical junction (CCJ) in neutral, flexion, and extension positions. In cases of poorly visualized anatomic landmarks, we confirmed their locations by rotating the patients head under continuous fluoroscopy, adjusting the radiation intensity, applying different available filters, and modulating the image in postprocessing.

The patient was asked to report the presence of any preexisting chief complaints, and a focused evaluation for signs and symptoms of mid- and lower-brainstem dysfunction was performed, including dyspnea, diplopia or blurred vision, and dysphagia for liquids. A brief neurological examination was also conducted; this was frequently unremarkable.

The Gardner-Wells tongs were then attached to a rope-and-pulley system, and vertical vector traction was initiated with 20 lb of weight. Traction was progressively increased in 10-minute intervals as tolerated, up to a maximum of 35 lb (40 lb in patients with a robust athletic build). At each increment, patients were asked to describe any change in each pre-traction symptom compared with baseline, reported subjectively as a percentage (e.g., 10% worse, 90% better, or no change).

Fifteen minutes after the final traction weight was reached, a repeat set of calibrated lateral-view CCJ fluoroscopic images and a neurological examination were performed. Traction weight was then reduced in a stepwise manner, and the tongs were removed. In selected cases, the traction weight was briefly removed and reapplied (“on/off” testing) to confirm or clarify the effect on specific symptoms or signs.
