# Supplementary material for: Surgical Screening Protocol for Craniocervical Instability Secondary to Ehlers-Danlos Syndrome and other Connective Tissue Disorders: Analysis of a 347 Patient Case Series
Source: Research Square preprint supplement (doi:10.21203/rs.3.rs-7675903/v1), 2025-12-03
Supplement: Supplementary file 8 [file e4260c44856ea100583a56b6.docx]

Chiari EDS Center

CRANIOCERVICAL FUSION – POSTOP Screen

**Last Name:**

**First Name:**

**DOB:**

**Today’s date:**

INSTRUCTIONS

We are asking you to complete this questionnaire as part of a Craniocervical Fusion (CCF) outcomes study.

The information you provide will help us in:

- Refining our clinical practice standards
- Publishing papers on the use of CCF in connective tissue disorder and other populations

The questionnaire is divided in four parts.

**PART ONE – Signs and Symptoms**

Please answer the questions by typing “X” in the appropriate column.

If a symptom/ sign DID NOT change after the surgery, type X under the “**Same**” column.

If a symptom or sign DID change after the surgery, type X under “**Better**” or “**Worse**” column.

If you did not have a certain symptom or sign before the surgery, and you still do not have it after the surgery, type “X” under the “**N/A**” column.

If you did not have a certain symptom or sign before the surgery, and now you do after the surgery, type “X” under the “**New**” column.

The last column marked “**%**” is to quantify the extent of the post-surgery change, if you have typed X under the “**Better**” or “**Worse**” column:

- 10% = very small change in that sign/symptom
- 25% = small change in that sign/symptom
- 50% = considerable change in that sign/symptom
- 75% = big change in that sign/symptom
- 90% = very big change in that sign/symptom
- 100% = total resolution of that sign/symptom (if better), OR doubling in intensity of the sign/symptoms (if worse)

Examples:

- An X in the “**Better**” column and a 75 in the “**%**” column means that you have experienced a big improvement for that pre-surgery symptom
- An X in the “**Worse**” column and a 25 in the “**%**” column means that you have experienced a small worsening for that pre-surgery symptom
- An X in the “**Better**” column and a 100 in the “**%**” column means that the preoperative symptom in question is now gone
- An X in the “**N/A**” column means that a specific symptom was not present before the surgery and now is still not present (you do not have to write a number in the “**%**” column in this case)
- An X in the “**New**” column means that a specific symptom was not present before the surgery, but has appeared and has persisted after the surgery (you do not have to write a number in the “**%**” column in this case)

| **QUESTIONS** | **Same** | **Better** | **Worse** | **New** | **N/A** | **%** |
| --- | --- | --- | --- | --- | --- | --- |
|  |  |  |  |  |  |  |
|  |  |  |  |  |  |  |
| **Headaches** |  |  |  |  |  |  |
| Do you have a pressure headache? |  |  |  |  |  |  |
| Is your headache localized in the back of the head? |  |  |  |  |  |  |
| Is the headache aggravated by coughing and straining? |  |  |  |  |  |  |
| Does the pain radiate to neck and/or shoulders? |  |  |  |  |  |  |
| Do you have pain or pressure behind the eyes? |  |  |  |  |  |  |
|  |  |  |  |  |  |  |
| **Signs and symptoms of Brainstem and Lower Cranial Nerve compromise** |  |  |  |  |  |  |
| Do you have problems swallowing? |  |  |  |  |  |  |
| Do you have problems swallowing liquids? |  |  |  |  |  |  |
| Do you have problems swallowing solids? |  |  |  |  |  |  |
| Do you feel a lump in the back of your throat? |  |  |  |  |  |  |
| Do you feel pain in the back of your throat? |  |  |  |  |  |  |
| Do you have palpitations? |  |  |  |  |  |  |
| Do you pass out? |  |  |  |  |  |  |
| Do you “almost pass out”? |  |  |  |  |  |  |
| Do you have sleep apnea? |  |  |  |  |  |  |
| Do you use a CPAP or BiPAP machine at night? |  |  |  |  |  |  |
| Do you snore? |  |  |  |  |  |  |
| Do you gasp for air during your sleep? |  |  |  |  |  |  |
| Are you short of breath? |  |  |  |  |  |  |
| Do you have severe nausea? |  |  |  |  |  |  |
| Are you getting hoarse? |  |  |  |  |  |  |
|  |  |  |  |  |  |  |
| **QUESTIONS** | **Same** | **Better** | **Worse** | **New** | **N/A** | **%** |
|  |  |  |  |  |  |  |
|  |  |  |  |  |  |  |
| **Vision and eyes motion** |  |  |  |  |  |  |
| Are you sensitive to light? |  |  |  |  |  |  |
| Do you often change prescriptions for your glasses? |  |  |  |  |  |  |
| Do you see double? |  |  |  |  |  |  |
| **I**s your vision blurry? |  |  |  |  |  |  |
| Do you see floaters? |  |  |  |  |  |  |
| Do you have nystagmus? |  |  |  |  |  |  |
| Does staring at patterns on the floor make you dizzy? |  |  |  |  |  |  |
|  |  |  |  |  |  |  |
| **Hearing and equilibrium** |  |  |  |  |  |  |
| Do you feel pressure deep inside your ears? |  |  |  |  |  |  |
| Does changing position make you dizzy? |  |  |  |  |  |  |
| Do you feel unsteady while standing still? |  |  |  |  |  |  |
| Do you feel unsteady while walking? |  |  |  |  |  |  |
| Do you have disequilibrium? |  |  |  |  |  |  |
| Do you have a ringing in your ears? |  |  |  |  |  |  |
| Do you have decreased hearing? |  |  |  |  |  |  |
| Do you have decreased hearing for high pitch sounds? |  |  |  |  |  |  |
| Do loud sounds bother you? |  |  |  |  |  |  |
| Do you have vertigo (= feeling that room is spinning)? |  |  |  |  |  |  |
|  |  |  |  |  |  |  |
| **Cerebellar function** |  |  |  |  |  |  |
| Do you have tremors when you try to pick something up? |  |  |  |  |  |  |
| Do you have problems with motor coordination? |  |  |  |  |  |  |
| Are you klutzy? |  |  |  |  |  |  |
|  |  |  |  |  |  |  |
| **QUESTIONS** | **Same** | **Better** | **Worse** | **New** | **N/A** | **%** |
|  |  |  |  |  |  |  |
| **High cortical functions** |  |  |  |  |  |  |
| Do you have problems retaining short term memories? |  |  |  |  |  |  |
| Do you have problems with concentration? |  |  |  |  |  |  |
| Do you have problems multitasking? |  |  |  |  |  |  |
| Are you failing or losing ground in school? |  |  |  |  |  |  |
| Are you failing or losing ground at work? |  |  |  |  |  |  |
| Do you have problems finding words? |  |  |  |  |  |  |
| Do you have long term memory loss? |  |  |  |  |  |  |
|  |  |  |  |  |  |  |
| **Behavior** |  |  |  |  |  |  |
| Do you have Attention Deficit Disorder? |  |  |  |  |  |  |
| Do you have Attention Deficit Hyperactivity Disorder? |  |  |  |  |  |  |
| Do you have Obsessive Compulsive Disorder? |  |  |  |  |  |  |
| Do you have Depression? |  |  |  |  |  |  |
| Do you have Anxiety? |  |  |  |  |  |  |
| Are you irritable? |  |  |  |  |  |  |
| Do you have Bipolar Disorder? |  |  |  |  |  |  |
| Do you have Asperger syndrome? |  |  |  |  |  |  |
| Do you have Autism? |  |  |  |  |  |  |
| Did you ever consider suicide? |  |  |  |  |  |  |
| Did you ever attempt suicide? |  |  |  |  |  |  |
|  |  |  |  |  |  |  |
|  |  |  |  |  |  |  |
|  |  |  |  |  |  |  |
|  |  |  |  |  |  |  |
|  |  |  |  |  |  |  |
|  |  |  |  |  |  |  |
|  |  |  |  |  |  |  |
| **QUESTIONS** | **Same** | **Better** | **Worse** | **New** | **N/A** | **%** |
|  |  |  |  |  |  |  |
|  |  |  |  |  |  |  |
| **Sensory and Pain** |  |  |  |  |  |  |
| Do you have areas of your body with no sensation? |  |  |  |  |  |  |
| Do you have areas of your body with decreased sensation? |  |  |  |  |  |  |
| Do you have areas of your body with increased sensation? |  |  |  |  |  |  |
| Do you have areas of your body with abnormal and weird sensation? |  |  |  |  |  |  |
| Do you have tingling anywhere in your body? |  |  |  |  |  |  |
| Do you have burning pain anywhere in your body? |  |  |  |  |  |  |
| Do you have stabbing pain anywhere in your body? |  |  |  |  |  |  |
| Do you have problems figuring out the temperature of objects and water using your skin? |  |  |  |  |  |  |
| Do you have problems figuring out where your body parts are in space? |  |  |  |  |  |  |
| Do you have facial pain? |  |  |  |  |  |  |
| Do you have facial numbness? |  |  |  |  |  |  |
| Is your pain so intense that you considered suicide in the past? |  |  |  |  |  |  |
|  |  |  |  |  |  |  |
| **Motor** |  |  |  |  |  |  |
| Do you have focal weakness? |  |  |  |  |  |  |
| Do you have generalized weakness? |  |  |  |  |  |  |
| Do you have tremors? |  |  |  |  |  |  |
| Do you have muscle spasms? |  |  |  |  |  |  |
| Are your legs stiff? |  |  |  |  |  |  |
| Do you have a diagnosis of Parkinson disease? |  |  |  |  |  |  |
| Do you have seizures? |  |  |  |  |  |  |
|  |  |  |  |  |  |  |
| **QUESTIONS** | **Same** | **Better** | **Worse** | **New** | **N/A** | **%** |
|  |  |  |  |  |  |  |
|  |  |  |  |  |  |  |
| **Others** |  |  |  |  |  |  |
| Non pressure headaches |  |  |  |  |  |  |
| Pain at the Craniocervical Junction |  |  |  |  |  |  |
| “Bobble-head” feeling |  |  |  |  |  |  |
| Pain /discomfort when riding in cars |  |  |  |  |  |  |
| Elevated Heart Rate |  |  |  |  |  |  |
| Fatigue |  |  |  |  |  |  |
| Brain fog (not just short term memory / words, but general processing speed) |  |  |  |  |  |  |
| Full body tremors |  |  |  |  |  |  |
|  |  |  |  |  |  |  |
|  |  |  |  |  |  |  |

**PART TWO - Complications**

| **Postoperative Complications** | **Yes** | **No** |
| --- | --- | --- |
|  |  |  |
| Did the CCF surgery result in any postoperative complication(s) ? Yes/No |  |  |
|  | | |
|  | | |
| If so, list them below AND indicate of they were temporary or permanent | | |
|  | | |
|  | | |
|  | | |
|  | | |
|  | | |
|  | | |
|  | | |
|  | | |
|  | | |
|  | | |
|  | | |
|  | | |
|  | | |
|  | | |
|  | | |
|  | | |
|  | | |
|  |  |  |
|  |  |  |
|  |  |  |

**PART THREE – Subsequent Surgeries**

| **Subsequent Surgeries** | **Yes** | **No** |
| --- | --- | --- |
|  |  |  |
| Since the CCF, have you had any other neurosurgical procedure? (y/n) |  |  |
|  | | |
| If so, please list the surgeries (only the neuro), in the lines below (one surgery per line), along with the respective dates | | |
|  | | |
|  | | |
|  | | |
|  | | |
|  | | |
|  | | |
|  | | |
|  | | |
|  | | |
|  | | |
|  | | |
|  | | |
|  | | |
|  | **Yes** | **No** |
|  |  |  |
| Are you currently scheduled for any other surgery in the future ? |  |  |
|  | | |
| If so, please list them in the lines below (one surgery per line) | | |
|  | | |
|  | | |
|  | | |
|  | | |
|  | | |

**PART FOUR — Overall Outcome and Patient Satisfaction**

|  |  |  |
| --- | --- | --- |
|  |  |  |
| **Postoperative Outcome** | **Yes** | **No** |
|  |  |  |
| Did the CCF surgery help improve your OVERALL CLINICAL CONDITION and QUALITY OF LIFE, once the post-surgery recovery was complete? |  |  |
| Was the OVERALL improvement mild? |  |  |
| Was the OVERALL improvement moderate? |  |  |
| Was the OVERALL improvement very significant ? |  |  |
|  |  |  |
|  |  |  |
| Did the CCF surgery make no difference whatsoever in your OVERALL CLINICAL CONDITION and QUALITY OF LIFE, once the post-surgery recovery was complete? |  |  |
|  |  |  |
|  |  |  |
| Did the CCF surgery contribute to worsening of your OVERALL CLINICAL CONDITION and QUALITY OF LIFE, once the post-surgery recovery was complete? |  |  |
| Was the OVERALL worsening mild? |  |  |
| Was the OVERALL worsening moderate? |  |  |
| Was the OVERALL worsening severe? |  |  |
|  |  |  |
| **Patient Satisfaction** | **Yes** | **No** |
|  |  |  |
|  |  |  |
|  |  |  |
| I am not satisfied about having had this surgery |  |  |
| I am a little satisfied about having had this surgery |  |  |
| I am moderately satisfied about having had this surgery |  |  |
| I am very satisfied about having had this surgery |  |  |
|  |  |  |
|  |  |  |
| I would not recommend this surgery to other patients |  |  |
| I would recommend this surgery to other patients |  |  |
| I would strongly recommend this surgery to other patients |  |  |
|  |  |  |
|  |  |  |
|  |  |  |

| **North American Spine Surgery Satisfaction Measure** |  |
| --- | --- |
| **Which best represents your feelings? (Choose one)** | **Yes** |
| 1. The treatment met my expectations |  |
| 2. I did not improve as much as I hoped, but I **would** undergo the same treatment for the same outcome |  |
| 3. I did not improve as much as I hoped, and I **would not** undergo the same treatment for the same outcome |  |
| 4. I am the same or worse than before treatment |  |

| **Chicago Chiari Outcome Scale** |  |
| --- | --- |
| **Describe your symptoms of PAIN (Choose one)** | **Yes** |
| 1. My symptoms are worse after surgery |  |
| 2. My symptoms are unchanged - meds do not help |  |
| 3. My symptoms are better - meds do help |  |
| 4. My symptoms are largely resolved, with no new symptoms |  |
|  |  |
| **Describe your symptoms NOT INVOLVING pain (Choose one)** | **Yes** |
| 1. My symptoms are worse after surgery |  |
| 2. My symptoms are unchanged - meds do not help |  |
| 3. My symptoms are better - meds do help |  |
| 4. My symptoms are largely resolved, with no new symptoms |  |
|  |  |
| **Describe your feeling of FUNCTIONALITY (Choose one)** | **Yes** |
| 1. I am not very functional |  |
| 2. I have **MILD** improvement in functionality (less than 50% ) |  |
| 3. I have **MODERATE** improvement (over 50%) |  |
| 4. I am nearly or fully functional |  |
|  |  |
| **Describe any COMPLICATIONS from treatment (Choose one)** | **Yes** |
| 1. I have complications that are **POORLY** controlled |  |
| 2. I have complications that are **WELL** controlled |  |
| 3. I only have occasional bouts with complications |  |
| 4. I have **NO** (or nearly no) complications |  |
